# Supplementary material
Source: PubMed Central journal article supplement (PMC4844242)
Supplement: supp_WNL.0000000000002613_Table_e-1.pdf [file supp_WNL.0000000000002613_Table_e-1.pdf]

**Table e-1: Patient Demographics and Aphasia Characteristics**

| Pt. # | Gender | Age@Ax  | Time Post-Stroke | Ravens (CPM) | Word Discrimination (BDAE) | Commands (BDAE) | Word Repetition (BDAE) | Boston Naming Test | Speech Fluency | Speech Fluency | Lesion Volume | Left AF-LL |
|-------|--------|---------|------------------|--------------|----------------------------|-----------------|------------------------|--------------------|----------------|----------------|---------------|------------|
|       |        | (years) | (months)         | [max=36]     | (% correct)                | (% correct)     | (% correct)            | (max = 15)         | (Words/min)    | (CIUs/min)     | (cc)          | (cc)       |
| 1     | M      | 45      | 11               | 36           | 97.3                       | 93.3            | 90.0                   | 14                 | 31.2           | 18.8           | 84.20         | 2.70       |
| 2     | M      | 55      | 7                | 31           | 91.9                       | 26.7            | 30.0                   | 5                  | 7.3            | 2.0            | 249.80        | 10.82      |
| 3     | F      | 62      | 15               | 32           | 81.1                       | 86.7            | 20.0                   | 0                  | 7.9            | 0.3            | 108.30        | 2.96       |
| 4     | M      | 45      | 11               | 32           | 28.4                       | 60.0            | 50.0                   | 0                  | 25.0           | 0.4            | 246.65        | 10.94      |
| 5     | M      | 61      | 13               | 35           | 100.0                      | 100.0           | N/A                    | 15                 | 77.9           | 63.5           | 12.68         | 0.07       |
| 6     | M      | 62      | 14               | 36           | 97.3                       | 93.3            | 0.0                    | 0                  | 2.3            | 0.6            | 71.18         | 7.09       |
| 7     | M      | 71      | 66               | 20           | N/A                        | 57.1            | 100.0                  | 3                  | 12.6           | 1.3            | 250.30        | 7.04       |
| 8     | F      | 54      | 12               | 33           | 87.8                       | 70.0            | 20.0                   | 6                  | 21.3           | 2.4            | 127.98        | 3.78       |
| 9     | M      | 59      | 16               | 31           | 33.8                       | 33.3            | 90.0                   | 1                  | 29.8           | 1.3            | 196.87        | 11.25      |
| 10    | M      | 74      | 65               | 34           | 97.3                       | 86.7            | 90.0                   | 14                 | 39.8           | 23.3           | 54.09         | 3.70       |
| 11    | M      | 53      | 25               | 36           | 62.2                       | 60.0            | 70.0                   | 5                  | 21.3           | 5.9            | 212.35        | 7.99       |
| 12    | M      | 65      | 108              | 34           | 91.9                       | 100.0           | 20.0                   | 3                  | 36.5           | 5.1            | 188.74        | 9.36       |
| 13    | M      | 63      | 6                | 20           | 82.4                       | 73.3            | 40.0                   | 0                  | 2.9            | 0.3            | 226.59        | 5.95       |
| 14    | M      | 67      | 9                | 35           | 62.2                       | 46.7            | 10.0                   | 0                  | 9.8            | 0.1            | 155.14        | 10.29      |
| 15    | F      | 66      | 27               | 34           | 89.2                       | 73.3            | 40.0                   | 8                  | 19.8           | 8.0            | 297.27        | 6.89       |
| 16    | M      | 60      | 21               | 24           | 66.2                       | 53.3            | 70.0                   | 1                  | 0.8            | 0.1            | 263.11        | 10.58      |
| 17    | F      | 37      | 19               | 36           | 100.0                      | 100.0           | 60.0                   | 13                 | 77.0           | 56.0           | 184.09        | 1.48       |
| 18    | M      | 56      | 15               | 26           | 86.5                       | 50.0            | 40.0                   | 3                  | 17.4           | 1.7            | 75.82         | 4.92       |
| 19    | M      | 44      | 44               | 35           | 100.0                      | 75.0            | 60.0                   | 14                 | 17.2           | 7.2            | 259.45        | 6.81       |
| 20    | M      | 51      | 12               | 33           | 70.3                       | 33.3            | 10.0                   | 0                  | 6.1            | 0.2            | 63.47         | 5.63       |
| 21    | M      | 62      | 77               | 35           | 58.1                       | 60.0            | 10.0                   | 0                  | 28.8           | 1.0            | 157.77        | 9.88       |
| 22    | M      | 62      | 25               | 30           | 43.2                       | 60.0            | 50.0                   | 0                  | 24.2           | 0.4            | 145.40        | 6.15       |
| 23    | M      | 56      | 79               | 34           | 73.0                       | 86.7            | 80.0                   | 12                 | 29.3           | 13.5           | 110.32        | 6.49       |
| 24    | M      | 65      | 18               | N/A          | 89.2                       | 87.5            | 100.0                  | 13                 | 50.8           | 37.0           | 14.37         | 1.24       |
| 25    | M      | 45      | 15               | 36           | 94.6                       | 100.0           | 90.0                   | 15                 | 50.8           | 29.2           | 15.23         | 0.08       |
| 26    | M      | 54      | 8                | 36           | 90.5                       | 100.0           | 90.0                   | 11                 | 41.8           | 24.5           | 42.61         | 3.35       |
| 27    | M      | 58      | 12               | N/A          | 98.6                       | 93.3            | 80.0                   | 10                 | 58.6           | 27.4           | 57.16         | 2.41       |
| 28    | F      | 71      | 96               | 25           | 68.9                       | 60.0            | 0.0                    | 0                  | 1.3            | 0.9            | 197.24        | 9.75       |
| 29    | M      | 56      | 18               | 28           | 82.4                       | 20.0            | 25.0                   | 0                  | 19.3           | 0.4            | 136.78        | 6.74       |
| 30    | M      | 47      | 18               | 27           | 83.8                       | 66.7            | 40.0                   | 2                  | 12.6           | 2.6            | 241.38        | 9.40       |
| 31    | M      | 63      | 24               | 36           | 79.7                       | 33.3            | 70.0                   | 4                  | 19.2           | 3.6            | 112.30        | 6.78       |
| 32    | M      | 51      | 9                | 33           | 39.2                       | 33.3            | 70.0                   | 2                  | 35.3           | 0.3            | 176.47        | 8.66       |
| 33    | M      | 64      | 92               | 36           | N/A                        | N/A             | N/A                    | 15                 | 47.5           | 28.8           | 72.10         | 5.20       |

**Table e-1.** Patient demographic data and aphasia characteristics including, in order: gender (28 M, 5 F), age at assessment (Age@Ax, measured in years), time from stroke onset to assessment (measured in months), Raven's Colored Progressive Matrices (CPM) score (a measure of nonverbal intelligence)[1], Auditory Comprehension measures from the Boston Diagnostic Aphasia Evaluation (BDAE) including the Discrimination, Commands, and Word Repetition tests (expressed in % correct)[2], the Short Form of the Boston Naming Test[3,4], two Speech Fluency measures (Words/min, CIUs/min)[5], lesion volume (in cc), and lesion load of the left arcuate fasciculus (AF-LL, in cc)[6,7].

1. Raven, J.C., Coloured Progressive Matrices, Oxford, UK: Oxford Psychologists Press, 1995.
2. Goodglass, H., and Kaplan, E., *Boston Diagnostic Aphasia Examination (BDAE)*. Philadelphia, PA: Lea & Febiger, 1983.
3. Kaplan, E., Goodglass, H., Weintraub, S., *Boston Naming Test (BNT)*, Philadelphia, PA: Lea & Febiger, 1983.
4. Del Toro, C. M., Bislick, L. P., Comer, M., Velozo, C., Romero, S., Gonzalez Rothi, L. J., Kendall, D. L., *Development of a short form of the Boston naming test for individuals with aphasia*. Journal of Speech, Language, and Hearing, 2011. **54**: p. 1089-1100
5. Nicholas, L.E. and R.H. Brookshire, *A system for quantifying the informativeness and efficiency of the connected speech of adults with aphasia*. Journal of Speech and Hearing Research, 1993. **36**: p. 338-350.
6. Marchina, S., et al., *Impairment of speech production predicted by lesion load of the left arcuate fasciculus*. Stroke, 2011. **42**(8): p. 2251-6.
7. Wang, J., et al., *Predicting speech fluency and naming abilities in aphasic patients*. Front Hum Neurosci, 2013. **7**: p. 831.
